# Supplementary material for: Incidence, risk factors and impact on outcomes of secondary infection in patients with septic shock: an 8-year retrospective study
Source: PubMed Central journal article supplement (PMC5141415; doi:10.1038/srep38361), 2016-12-07
Supplement: srep38361-s1.pdf [file srep38361-s1.pdf]

**Incidence, risk factors and impact on outcomes of secondary infection in patients  
with septic shock: an 8-year retrospective study**

Guang-ju ZHAO, Dong LI, Qian ZHAO, Jia-xing SONG, Xiao-rong CHEN,  
Guang-liang HONG, Meng-fang LI, Bing WU, Zhong-qiu LU

**Supporting information:**

Figure S1: Time distribution of septic shock deaths

Figure S2: The frequency of secondary infection over time

Figure S3: Multistate model used to determine hospital length of stay

Table S1: Demographic and clinical characteristics of survivors and non-survivors.

Table S2: The effect of patient characteristics on hospital length of stay by univariate analysis.

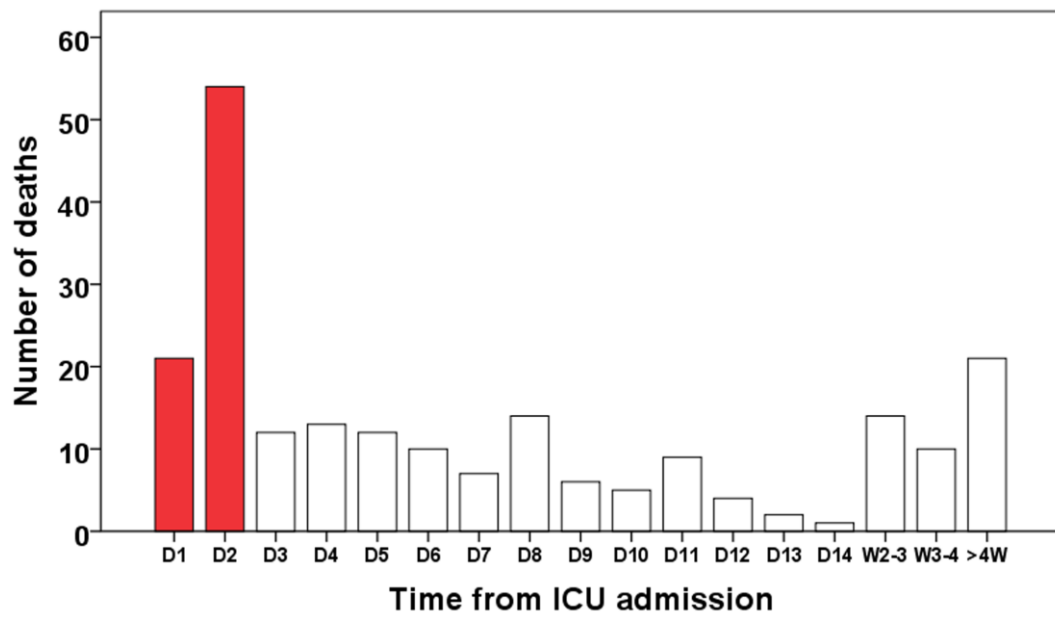

**Figure S1.** Time distribution of septic shock deaths

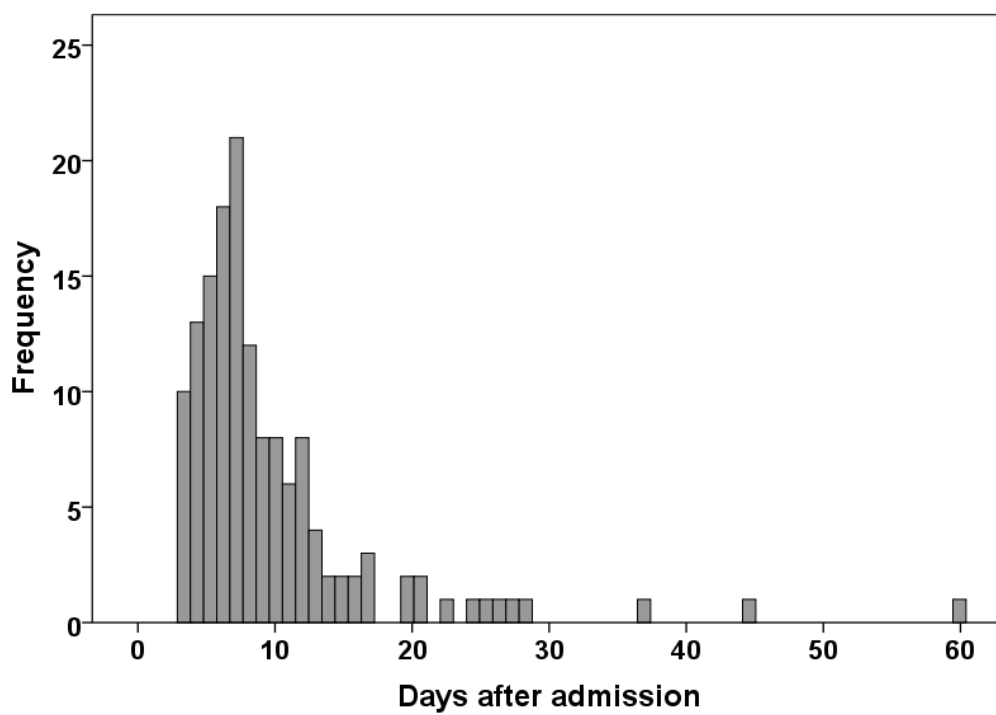

**Figure S2:** The frequency of secondary infection over time

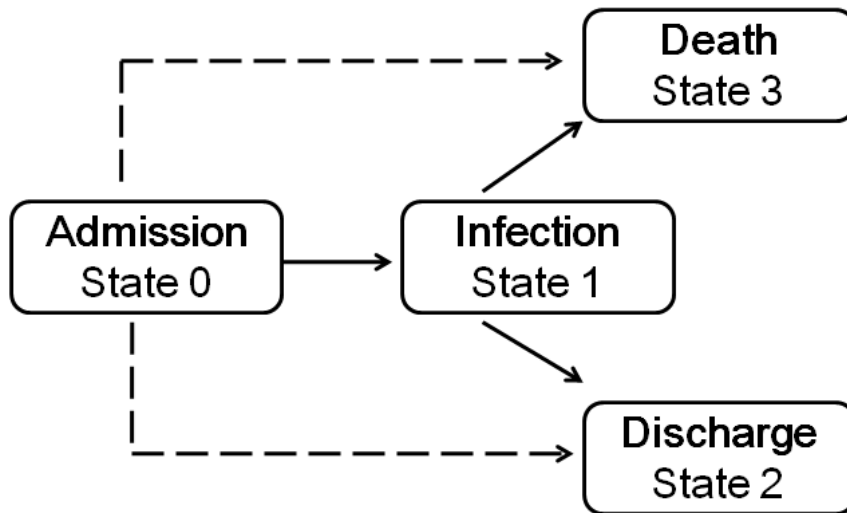

**Figure S3.** Multistate model used to determine hospital length of stay

**Table S1.** Demographics and clinical characteristic of late-phase septic shock patients

| <b>Variables</b>                     | <b>Total<br/>(n=372)</b> | <b>Survivors<br/>(n=244)</b> | <b>Non-Survivors<br/>(n=128)</b> | <b>P value</b>    |
|--------------------------------------|--------------------------|------------------------------|----------------------------------|-------------------|
| <b>Age (years)</b>                   |                          |                              |                                  |                   |
| Median (25th, 75th)                  | 63 (52, 75)              | 60 (50, 70)                  | 70 (58, 80)                      | <b>&lt; 0.001</b> |
| <b>&gt;65 years, n(%)</b>            | 161 (43.3%)              | 87 (35.7%)                   | 74 (57.8%)                       | <b>&lt; 0.001</b> |
| <b>Male, n(%)</b>                    | 217(58.3%)               | 135 (55.7%)                  | 82 (64.1%)                       | 0.121             |
| <b>Comorbidities, n(%)</b>           |                          |                              |                                  |                   |
| Chronic cardiac disease              | 135 (36.3%)              | 80 (32.8%)                   | 55 (43.0%)                       | 0.052             |
| Chronic pulmonary disease            | 28 (7.5%)                | 15 (6.15%)                   | 13 (10.2%)                       | 0.164             |
| Kidney failure                       | 32 (8.6%)                | 21 (8.6%)                    | 11 (8.6%)                        | 0.997             |
| hepatic cirrhosis                    | 34 (9.1%)                | 23 (9.4%)                    | 11 (8.6%)                        | 0.791             |
| Diabetes                             | 75 (20.2%)               | 55 (22.5%)                   | 22 (17.2%)                       | 0.226             |
| Cancer or tumor                      | 37 (9.9%)                | 23 (9.4%)                    | 14 (10.9%)                       | 0.852             |
| <b>Admission category, n(%)</b>      |                          |                              |                                  |                   |
| Medical needs                        | 306 (82.3%)              | 200 (82.0%)                  | 106 (82.8%)                      |                   |
| Surgical needs                       | 66 (17.7%)               | 44 (28.0%)                   | 22 (27.2%)                       | 0.839             |
| <b>Immunosuppressive agent, n(%)</b> |                          |                              |                                  |                   |
| Corticosteroid                       | 16 (4.3%)                | 8 (3.3%)                     | 8 (6.3%)                         | 0.180             |
| Other immunospressive drugs          | 17 (4.6%)                | 11 (4.5%)                    | 6 (4.7%)                         | 0.937             |
| Alcohol abuse                        | 105 (28.2%)              | 70 (28.7%)                   | 35 (27.3%)                       | 0.784             |
| <b>Site of infection, n(%)</b>       |                          |                              |                                  |                   |
| Respiratory tract                    | 101 (27.2%)              | 57 (23.3%)                   | 44 (34.3%)                       | <b>0.023</b>      |
| Urinary tract                        | 54 (14.5%)               | 46 (18.9%)                   | 8 (6.3%)                         | <b>&lt; 0.001</b> |
| Abdominal                            | 145 (38.9%)              | 91 (37.3%)                   | 54 (42.2%)                       | 0.358             |

|                                     |             |             |             |                |
|-------------------------------------|-------------|-------------|-------------|----------------|
| Skin and soft tissue                | 52 (14.0%)  | 34 (13.9%)  | 18 (14.1%)  | 0.973          |
| <b>Positive blood culture, n(%)</b> | 141 (37.9%) | 78 (32.1%)  | 63 (49.2%)  | <b>0.001</b>   |
| <b>SAPS II at onset of shock</b>    |             |             |             |                |
| Overall, median (25th, 75th)        | 48 (41, 57) | 46 (38, 54) | 55 (47, 64) | < <b>0.001</b> |
| <b>SOFA score at onset of shock</b> |             |             |             |                |
| Overall, median (25th, 75th)        | 8 (10, 12)  | 9.5 (7, 12) | 10 (8, 13)  | <b>0.011</b>   |
| <b>Duration of shock, days</b>      | 4 (3, 8)    | 4 (3, 7)    | 5 (3, 9)    | <b>0.018</b>   |
| <b>Secondary infection, n(%)</b>    | 128 (39.0%) | 76 (31.1%)  | 69 (47.6%)  | < <b>0.001</b> |

SAPS II: Simplified Acute Physiology Score II; SOFA: Sequential Organ Failure Assessment

**Table S2.** The effect of patient characteristics on hospital LOS by univariate analysis

| Variable                        | Median (25th, 75th) LOS (days) |              | P value          |
|---------------------------------|--------------------------------|--------------|------------------|
|                                 | Yes                            | No           |                  |
| <b>Age&gt;65 years</b>          | 13 (8, 28)                     | 15 (10, 23)  | 0.596            |
| <b>Male</b>                     | 14 (9, 27)                     | 15 (10, 22)  | 0.515            |
| <b>≥ two comorbidities</b>      | 14 (9, 27)                     | 14 (9, 23)   | 0.602            |
| <b>Immunosuppressive agents</b> |                                |              |                  |
| alcohol abuse                   | 17 (10, 28)                    | 14 (9, 22)   | <b>0.019</b>     |
| Corticosteroid                  | 14.5 (8, 27)                   | 14 (9, 24)   | 0.846            |
| Other immunosuppressive drugs   | 15 (8, 27)                     | 14 (9, 24)   | 0.939            |
| <b>Surgical needs</b>           | 18 (9, 31)                     | 14 (9, 23)   | 0.139            |
| <b>Site of infection</b>        |                                |              |                  |
| Abdominal                       | 13 (9, 21)                     | 15 (9, 26)   | 0.063            |
| Respiratory tract               | 14 (9, 24)                     | 14 (9, 25)   | 0.957            |
| Urinary tract                   | 16 (12, 25)                    | 14 (9, 24)   | 0.185            |
| Skin and soft tissue            | 22 (9, 32)                     | 14 (9, 22)   | <b>0.046</b>     |
| <b>Positive blood culture</b>   | 14 (8, 26)                     | 14 (10, 23)  | 0.562            |
| <b>SOFA score</b>               |                                |              |                  |
| <8                              | 13 (10, 21)                    | 15 (9, 26)   | 0.286            |
| 8-12                            | 13 (8, 22)                     | 15 (11, 27)  | 0.057            |
| >12                             | 19 (11, 31)                    | 13 (9, 22)   | <b>0.001</b>     |
| <b>SAPS II score</b>            |                                |              |                  |
| <41                             | 14 (10, 23)                    | 14 (7, 29)   | 0.221            |
| 41-56                           | 15 (10, 23)                    | 13 (7, 25)   | 0.188            |
| >56                             | 13 (9, 22)                     | 14 (10, 25)  | 0.721            |
| <b>Duration of shock</b>        |                                |              |                  |
| >7 days                         | 19.5 (14, 29)                  | 13 (8, 22)   | <b>&lt;0.001</b> |
| 4-7 days                        | 12 (8, 19)                     | 17 (11, 26)  | <b>&lt;0.001</b> |
| <4 days                         | 13.5 (9, 25)                   | 14 (9, 25)   | 0.333            |
| <b>Interventions</b>            |                                |              |                  |
| Steroid treatment               | 17 (10, 29)                    | 13 (9, 21)   | <b>0.001</b>     |
| blood transfusion               | 15 (9, 27)                     | 13 (10, 19)  | 0.144            |
| Total parenteral nutrition      | 14 (8, 23)                     | 14 (9, 25)   | 0.466            |
| Renal replacement therapy       | 16 (8, 29)                     | 14 (10, 23)  | 0.700            |
| Intubation                      | 16 (7, 30)                     | 13 (10, 21)  | 0.096            |
| Deep vein catheterization       | 15 (9, 26)                     | 12 (8.25 19) | <b>0.023</b>     |
| <b>Secondary infection</b>      | 19 (11, 33)                    | 13 (8, 20)   | <b>&lt;0.001</b> |

SAPS II: Simplified Acute Physiology Score II; SOFA: Sequential Organ Failure Assessment; LOS, length of stay

Columns "Yes" and "No" refer to the presence and absence of the variables in the "Variable" column, respectively.
